# Supplementary material for: Urinary Bladder Metastasis from Gastric Cancer: A Case Report and Review of the Literature
Source: MDPI journal article supplement (doi:10.3390/reports4020014), 2021-05-18
Supplement: s1 [file s1]

| Author/year                   | Number of patients | Gender      | Age            | Interval between primary gastric cancer and bladder metastasis | Distant metastases at the time of diagnosis | Other metastatic sites(at the time of diagnosis or in progress of disease exept bladder metastasis) | Endoscopic findings                                                                               | Macroscopic features of bladder metastasis                                  | Urinary Symptoms                                       | Presence of hydronephrosis | Treatment of primary tumour                                                                        | Treatment of bladder metastasis           | Prognosis                                                  |
|-------------------------------|--------------------|-------------|----------------|----------------------------------------------------------------|---------------------------------------------|-----------------------------------------------------------------------------------------------------|---------------------------------------------------------------------------------------------------|-----------------------------------------------------------------------------|--------------------------------------------------------|----------------------------|----------------------------------------------------------------------------------------------------|-------------------------------------------|------------------------------------------------------------|
| Nakamura et al (1992) [12]    | 1                  | M           | 55             | 9 months                                                       | No                                          | Peritoneum                                                                                          | NR                                                                                                | Diffuse wall thickening                                                     | Frequent urination and voiding pain                    | NR                         | Gastrectomy                                                                                        | Chemotherapy                              | Died 9 months after chemotherapy                           |
| Saba et al. (1997) [13]       | 1                  | M           | 52             | 7 years                                                        | Yes                                         | Peritoneum, pleura, lymph nodes                                                                     | Large broad-based lesion at the posterior wall, with mucinous strands                             | Protuberant mass                                                            | Hematuria                                              | No                         | Chemotherapy                                                                                       | No treatment                              | Died                                                       |
| Ota et al. (1999) [14]        | 1                  | F           | 57             | 2 years                                                        | No                                          | No                                                                                                  | NR                                                                                                | Diffuse wall thickening                                                     | Incontinence                                           | Yes                        | Gastrectomy                                                                                        | Chemotherapy                              | Alive after 12 month follow up                             |
| Uemura et al. (2000) [15]     | 1                  | M           | 59             | 21 months                                                      | No                                          | Lymph nodes                                                                                         | NR                                                                                                | Diffuse wall thickening                                                     | Frequent urination, voiding pain and hematuria         | NR                         | Gastrectomy                                                                                        | TUR                                       | NR                                                         |
| Puerta et al. (2000) [16]     | 1                  | F           | 52             | 2 years                                                        | No                                          | NR                                                                                                  | NR                                                                                                | Diffuse wall thickening                                                     | NR                                                     | Yes                        | Gastrectomy                                                                                        | Ureteral palliative catheterization       | NR                                                         |
| Kim et al. (2000) [17]        | 3                  | M<br>F<br>M | 60<br>57<br>42 | 1 year<br>15 months<br>2 years                                 | No<br>No<br>No                              | NR<br>NR<br>NR                                                                                      | NR<br>Bullous oedema of the bladder mucosa<br>Oedematous mucosa of the bladder with a small ulcer | Focal wall thickening<br>Diffuse wall thickening<br>Diffuse wall thickening | Dysuria, sense of residual urine<br>Dysuria<br>Dysuria | NR<br>NR<br>NR             | NR<br>NR<br>NR                                                                                     | NR<br>NR<br>Total cystectomy              | NR<br>NR<br>NR                                             |
| Antunes et al. (2004) [18]    | 1                  | F           | 63             | 21 months                                                      | Yes                                         | Peritoneum , Ascites                                                                                | Extensive vegetative lesion in the bladder                                                        | Diffuse wall thickening                                                     | Dysuria, lumbar pain                                   | Yes                        | Partial Gastrectomy                                                                                | No treatment                              | Alive after 8 month follow up                              |
| Matsuhashi et al. (2005) [19] | 1                  | F           | 90             | Synchronous metastasis                                         | Yes                                         | No                                                                                                  | Lesion in the bladder diverticulum                                                                | Protuberant mass (in a bladder diverticulum)                                | Hematuria                                              | Yes                        | Palliative distal gastrectomy                                                                      | No treatment                              | Died 3 months after the diagnosis                          |
| Farhat et al. (2007) [20]     | 1                  | M           | 58             | 15 months                                                      | No                                          | No                                                                                                  | NR                                                                                                | Protuberant mass                                                            | Hematuria                                              | No                         | Total gastrectomy and adjuvant chemotherapy                                                        | TUR                                       | NR                                                         |
| Lim et al. (2011) [21]        | 1                  | M           | 51             | 2 years                                                        | No                                          | Peritoneum, bones                                                                                   | NR                                                                                                | Protuberant mass                                                            | Hematuria                                              | Yes                        | NR                                                                                                 | Partial cystectomy, systemic chemotherapy | Died 7 months after the surgery                            |
| Sharma et al. (2011) [10]     | 1                  | M           | 30             | 2 years                                                        | No                                          | No                                                                                                  | Multiple grape-like lesions on the dome and left bladder                                          | Protuberant mass                                                            | Hematuria                                              | No                         | Radical D2 partial gastrectomy                                                                     | TUR/Chemotherapy                          | Alive 5 months after chemotherapy                          |
| Neves et al. (2011) [22]      | 2                  | F<br>M      | 62<br>41       | synchronous metastasis<br>synchronous metastasis               | Yes<br>Yes                                  | peritoneum, ovary<br>No                                                                             | NR<br>NR                                                                                          | Diffuse wall thickening<br>Protuberant mass                                 | Dysuria, infrequency, lumbar pain<br>Hematuria         | Yes<br>No                  | NR<br>NR                                                                                           | No treatment<br>Partial cystectomy        | Died<br>Died                                               |
| Andras et al. (2013) [23]     | 1                  | M           | 59             | 10 years                                                       | No                                          | No                                                                                                  | Mucosal hyperaemia lesion close to the ureteric orifice                                           | Protuberant mass                                                            | No urinary symptoms                                    | No                         | Billroth II resection of stomach, omnectomy and D2 lymph node dissection and adjuvant chemotherapy | TUR/Chemotherapy                          | NR                                                         |
| Vigliar et al. (2013) [24]    | 1                  | M           | 38             | 7 months                                                       | Yes                                         | Peritoneum, pleura, lymph nodes                                                                     | NR                                                                                                | Protuberant mass                                                            | Hematuria                                              | Yes                        | NR                                                                                                 | No treatment                              | Died 2 months after diagnosis of bladder metastasis        |
| Kalra et al. (2015) [25]      | 1                  | M           | 60             | synchronous metastasis                                         | Yes                                         | Peritoneum                                                                                          | Smooth wall diffusely erythematous small capacity bladder                                         | Diffuse wall thickening                                                     | Lower urinary tract symptoms                           | Yes                        | Chemotherapy                                                                                       | Chemotherapy, bilateral nephrostomy tubes | Alive (follow up NR)                                       |
| Okutur et al. (2015) [26]     | 1                  | M           | 48             | synchronous metastasis                                         | Yes                                         | Peritoneum, lymph nodes                                                                             | Diffuse papillary nodular lesion                                                                  | Diffuse wall thickening                                                     | Hematuria                                              | Yes                        | Chemotherapy                                                                                       | Chemotherapy                              | Alive 5 months after diagnosis                             |
| Seow-En et al. (2015) [27]    | 1                  | M           | 75             | 20 years                                                       | No                                          | Lymphadenopathy rectum                                                                              | Mucosal tumor growth                                                                              | Diffuse wall thickening                                                     | Frequency                                              | Yes                        | Total gastrectomy and adjuvant chemotherapy                                                        | Chemotherapy                              | Alive four months since diagnosis                          |
| Silva et al. (2015) [28]      | 1                  | F           | 40             | synchronous metastasis                                         | Yes                                         | Lung, paraortal, mediastinal and supraclavicular lymph nodes, liver                                 | NR                                                                                                | Diffuse wall thickening                                                     | No urinary symptoms                                    | No                         | No therapy                                                                                         | No therapy                                | Died 1 month after diagnosis due to refrctory septic shock |
| Hung et al. (2016) [39]       | 1                  | F           | 62             | 14 years                                                       | No                                          | Paraortic, mediastinal and supraclavicular lymph nodes                                              | NR                                                                                                | Protuberant mass                                                            | Hematuria                                              | No                         | Subtotal gastrectomy                                                                               | Palliative Chemotherapy                   | NR                                                         |
| Sima et al. (2016) [30]       | 1                  | F           | 58             | synchronous metastasis                                         | Yes                                         | Liver, Peritoneum, Ascites, Pleural effusion                                                        | NR                                                                                                | Diffuse wall thickening                                                     | Dysuria                                                | Yes                        | NR                                                                                                 | TUR                                       | NR                                                         |

|                            |   |        |          |                                    |            |                                          |                                                                                                         |                                             |                                    |            |                                                                          |                                    |                                                     |
|----------------------------|---|--------|----------|------------------------------------|------------|------------------------------------------|---------------------------------------------------------------------------------------------------------|---------------------------------------------|------------------------------------|------------|--------------------------------------------------------------------------|------------------------------------|-----------------------------------------------------|
| Lodh et al. (2016) [31]    | 1 | M      | 53       | synchronous metastasis             | Yes        | No                                       | Protuberant mass                                                                                        | Protuberant mass                            | Abdominal fullness                 | No         | Total gastrectomy and perioperative chemotherapy                         | TUR and perioperative chemotherapy | Stable three month later                            |
| Khoury et al. (2019) [32]  | 1 | M      | 75       | 2 yeas                             | No         | No                                       | Extensive vegetative lesion                                                                             | Diffuse wall thickening                     | Lumbar pain                        | Yes        | NR                                                                       | NR<br>NR<br>Total cystectomy       | NR                                                  |
| Nouioui et al. (2020) [33] | 2 | M<br>M | 72<br>36 | synchronous metastasis<br>5 months | Yes<br>Yes | Peritoneum, Ascites<br>Peritoneum, Bones | Extensive bullous oedema of the bladder mucosa<br>Two solid protuberant nodular lesions                 | Diffuse wall thickening<br>Protuberant mass | Nycturia, and urgency<br>Hematuria | Yes<br>Yes | Palliative<br>Chemotherapy<br>Palliative<br>Chemotherapy                 | Chemotherapy<br>Chemotherapy       | Alive at the time<br>Alive at the time              |
| Present report             | 1 | M      | 65       | 8 months                           | No         | Peritoneum , Ascites,<br>Liver           | Two solid protuberant nodular lesions one in the trigone and the other in the left lateral bladder wall | Protuberant mass                            | Hematuria                          | Yes        | Total gastrectomy with D2 lymphadenectomy and perioperative chemotherapy | Chemotherapy                       | Died 2 months after diagnosis of bladder metastasis |

NR: Not reported
